# Supplementary material for: Subclinical hypothyroidism and depression: a meta-analysis
Source: PubMed Central journal article supplement (PMC6207556; doi:10.1038/s41398-018-0283-7), 2018-10-30

|                               | Random sequence generation (selection bias) | Allocation concealment (selection bias) | Blinding of participants and personnel (performance bias) | Blinding of outcome assessment (detection bias) | Incomplete outcome data (attrition bias) | Selective reporting (reporting bias) | Other bias |
|-------------------------------|---------------------------------------------|-----------------------------------------|-----------------------------------------------------------|-------------------------------------------------|------------------------------------------|--------------------------------------|------------|
| J. Parle 2010                 | -                                           | +                                       | +                                                         | +                                               | +                                        | +                                    | ?          |
| Laily Najafi 2015             | ?                                           | +                                       | +                                                         | +                                               | +                                        | +                                    | +          |
| Rolf Jorde 2006               | ?                                           | +                                       | +                                                         | -                                               | +                                        | +                                    | ?          |
| Vaneska Spinelli Reuters 2012 | -                                           | +                                       | +                                                         | +                                               | +                                        | +                                    | ?          |

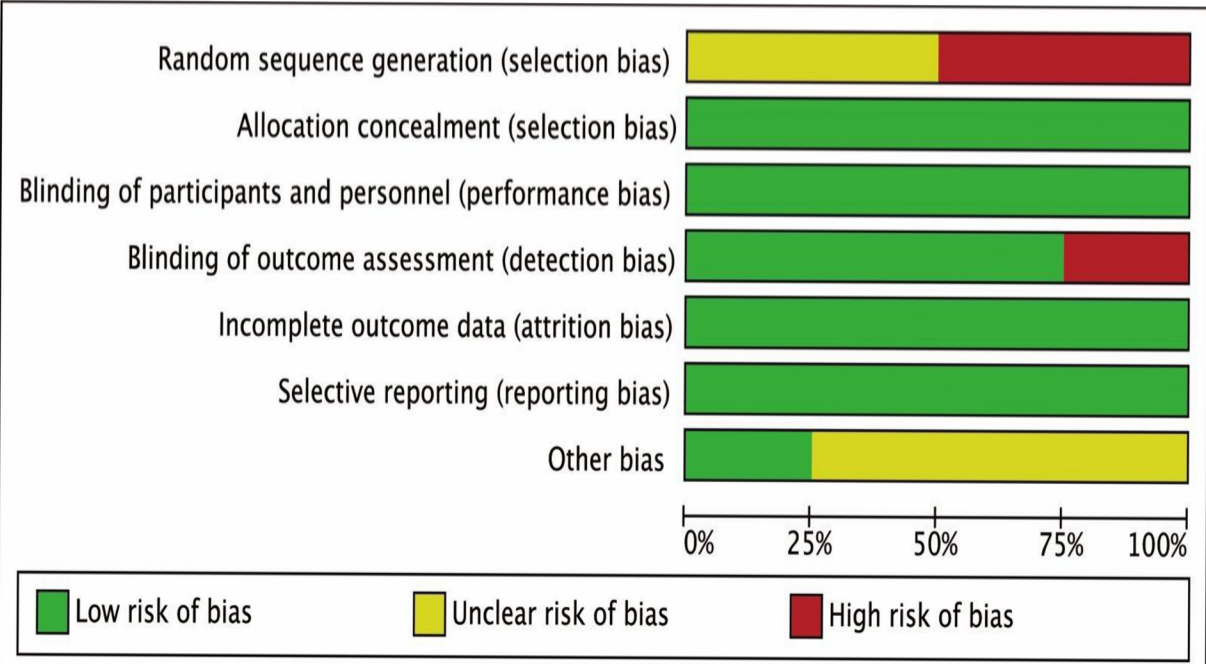

Supplement: 41398_2018_283_MOESM2_ESM.pdf [file 41398_2018_283_MOESM2_ESM.pdf]
