# Supplementary material for: Subclinical hypothyroidism and depression: a meta-analysis
Source: PubMed Central journal article supplement (PMC6207556; doi:10.1038/s41398-018-0283-7), 2018-10-30

Begg's funnel plot with pseudo 95% confidence limits

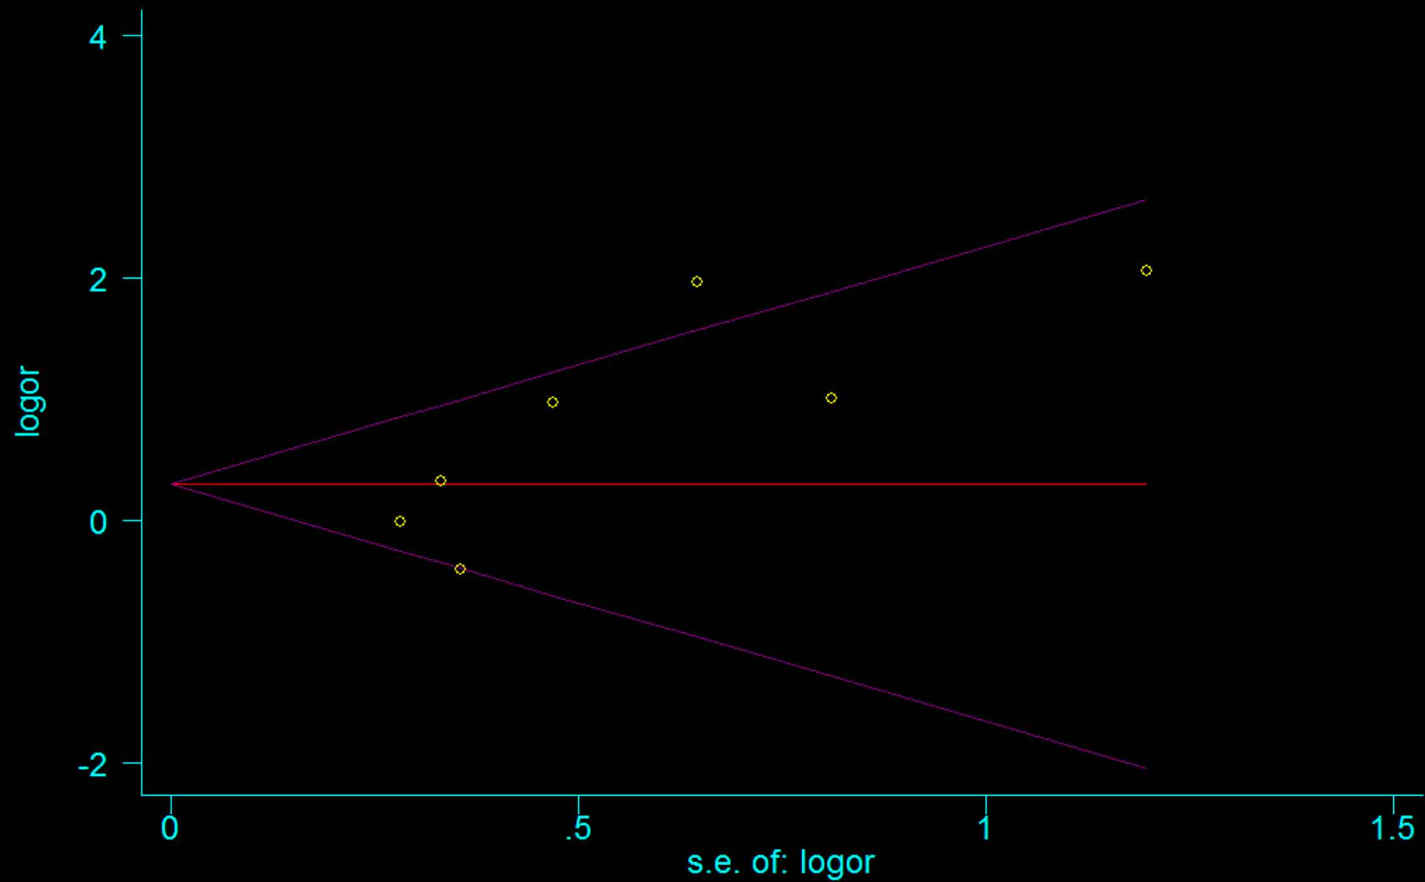

Supplement: 41398_2018_283_MOESM4_ESM.pdf [file 41398_2018_283_MOESM4_ESM.pdf]
